# Supplementary material
Source: PubMed Central journal article supplement (PMC3655631)
Supplement: Supp_Fig1.pdf [file Supp_Fig1.pdf]

## Supplementary Material

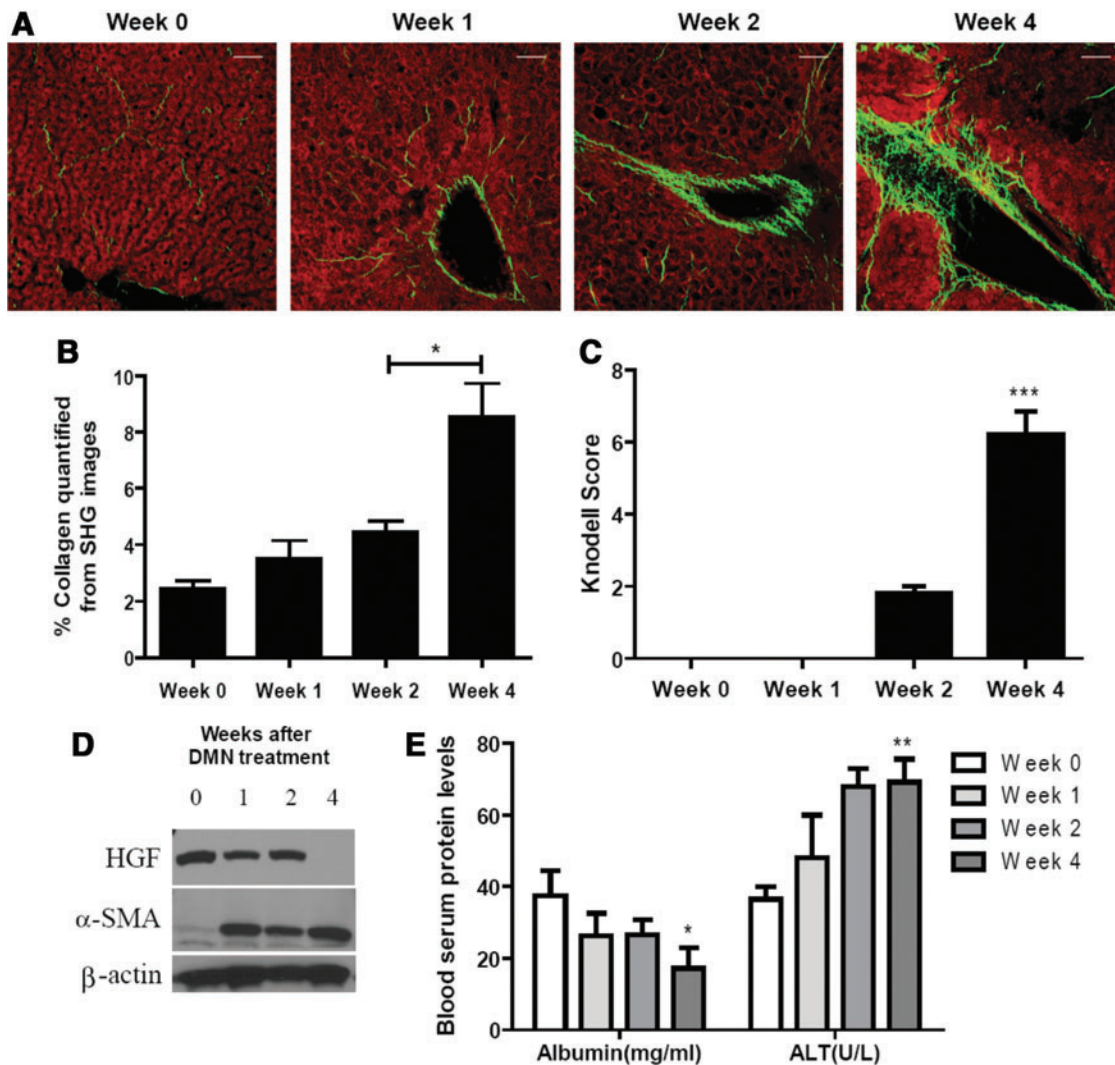

**SUPPLEMENTARY FIG. S1.** Structural and dynamic changes in dimethylnitrosamine (DMN)-treated rats. Increased collagen accumulation in DMN-treated rats by second harmonic generation microscopy (SHG) images (**A** and **B**). Knodell score measured from Masson's trichrome and haematoxylin and eosin (H&E)-stained liver tissue sections (**C**). Decreased levels of hepatocyte growth factor HGF and increased levels of  $\alpha$ -SMA protein expression with DMN-induced fibrosis as observed in western blots (**D**). Albumin levels decreased with fibrosis progression whereas alanine transaminase (ALT) levels increased significantly with fibrosis progression in the blood serum (**E**). \* $p < 0.05$ , \*\* $p < 0.01$ , \*\*\* $p < 0.001$ .
