# Supplementary material
Source: PubMed Central journal article supplement (PMC3655631)
Supplement: Supp_Fig2.pdf [file Supp_Fig2.pdf]

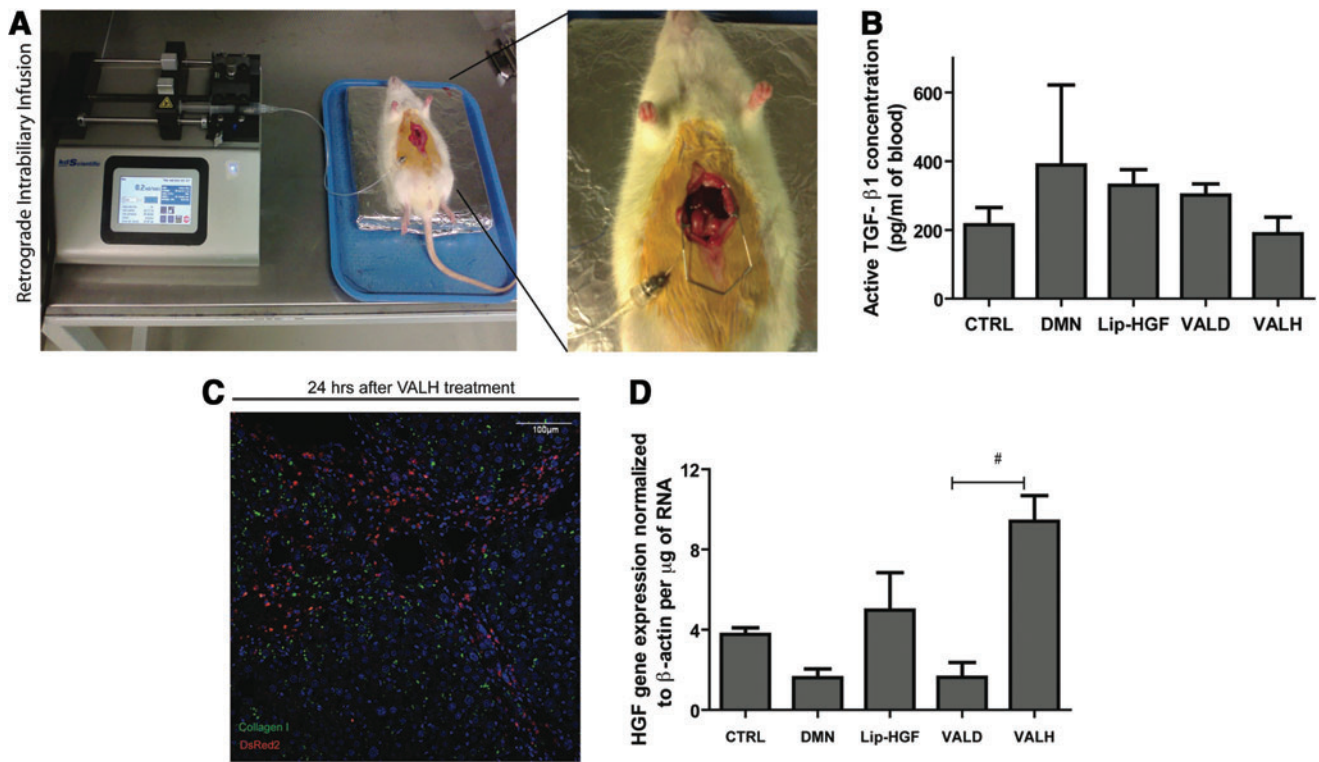

**SUPPLEMENTARY FIG. S2.** Retrograde intrahepatic infusion of vitamin A-coupled liposomes with pDsRed2-HGF plasmid (VALH) particles in DMN-induced fibrotic rats. Retrograde intrahepatic infusion of liposome/DNA complexes into DMN-induced fibrotic rats at a constant flow rate of 0.2 ml/min with a 32G Hamilton needle (**A**). Active TGF-β1 levels in the blood serum of rats 7 days after various treatments (**B**). Increased expression of DsRed2 protein at the collagen I-rich fibrotic foci 24 hours after VALH treatment (**C**). Increased gene expression of *HGF* in VALH-treated rat liver but not statistically significant compared to Lip-HGF treatment (**D**). #  $p < 0.01$  compared to VALD as analyzed from one-way ANOVA and Tukey's multiple comparison test.
