# Supplementary material
Source: PubMed Central journal article supplement (PMC3655631)
Supplement: Supp_Fig3.pdf [file Supp_Fig3.pdf]

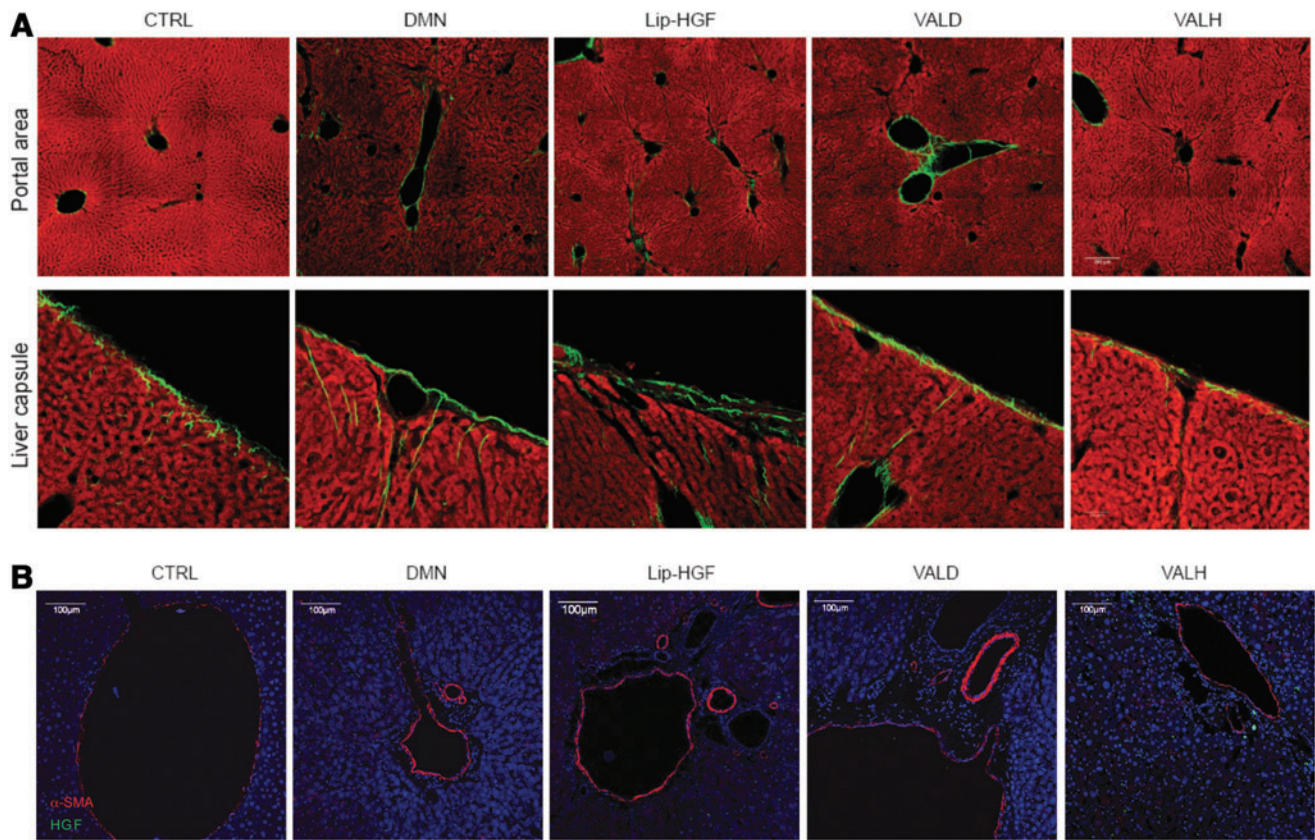

**SUPPLEMENTARY FIG. S3.** VALH treatment caused a decline in collagen I and  $\alpha$ -SMA levels at the fibrotic foci. Collagen I (green) levels at the portal regions and the liver capsule as observed in SHG images of treated liver tissue sections (**A**).  $\alpha$ -SMA (red) and HGF (green) levels at the fibrotic foci as observed in immunostained liver tissue sections (**B**) 7 days after treatment.
